# Supplementary material
Source: Elsevier journal article supplement (https://www.sciencedirect.com/science/article/pii/S1134009618301992)
Supplement: mmc1 [file S1134009618301992:mmc1.xlsx]

## Sheet: Registro de Actividad
CIRUGIA ADULTOS CON CEC
1. Cardiopatías adquiridas
VALVULARES AISLADOS CON CEC
1 VALVULA AISLADA	CASOS	Nº EXITUS	EUROSCORE I LOGISTICO	EUROSCORE II
Sustitución Aórtica
Sustitución Mitral
Sustitución Tricúspide
Sustitución Pulmonar
TOTAL SUSTITUCIÓN 1 VALVULA AISLADA	0	0	#DIV/0!	#DIV/0!
Aórtica Reparación
Mitral Reparación
Tricúspide Reparación
Pulmonar Reparación
TOTAL REPARACIÓN 1 VALVULA AISLADA	0	0	#DIV/0!	#DIV/0!
TOTAL UNIVALVULARES AISLADOS	0	0	#DIV/0!	#DIV/0!
2 o MAS VÁLVULAS	CASOS	Nº EXITUS	EUROSCORE I LOGISTICO	EUROSCORE II
Sustitución de dos válvulas
Sustitución de una válvula y reparación de otra
Reparación de dos válvulas
Cirugía Sobre tres o más válvulas
TOTAL 2 o MAS VALVULAS	0	0	#DIV/0!	#DIV/0!
VALVULARES + REVASCULARIZACION	CASOS	Nº EXITUS	EUROSCORE I LOGISTICO	EUROSCORE II
Prótesis aórtica + Derivación coronaria
Plastia aórtica + Derivación coronaria
Prótesis Mitral + Derivación coronaria
Plastia mitral + Derivación coronaria
Dos o más válvulas + Derivación coronaria
TOTAL VALVULARES + REVASCULARIZACION	0	0	#DIV/0!	#DIV/0!
TOTAL CIRUGIA VALVULAR	0	0
TOTAL DE PROTESIS UTILIZADAS EN TU SERVICIO	NUMERO
Prótesis mecánicas
Prótesis biológicas convencionales
Prótesis biológicas de despliegue rápido (excluyendo TAVI)
Anillos protésicos
Homoinjertos
Prótesis vasculares con válvula mecánica
Prótesis vascular con válvula biológica
TOTAL PROTESIS	0
CIRUGIA CORONARIOS CON CEC
CIRUGIA REVASCULARIZACION AISLADA	CASOS	Nº EXITUS	EUROSCORE I LOGISTICO	EUROSCORE II
Una derivación
Dos derivaciones
Tres o más derivaciones
TOTAL CIRUGIA REVASCULARIZACION AISLADA	0	0	#DIV/0!	#DIV/0!
PACIENTES CON UN INJERTO ARTERIAL
PACIENTES CON MAS DE UN INJERTO ARTERIAL
CIRUGIA COMPLICACION mecánica IAM	CASOS	Nº EXITUS	EUROSCORE I LOGISTICO	EUROSCORE II
Aneurisma ventricular con o sin revascularización
CIV con o sin revascularización
Ruptura cardíaca con o sin revascularización
Insuficiencia mitral aguda con o sin revascularización
TOTAL CIRUGIA COMPLICACION IAM	0	0	#DIV/0!	#DIV/0!
CIRUGIA DE LA AORTA CON CEC
CIRUGIA DE LA AORTA ELECTIVA	CASOS	Nº EXITUS	EUROSCORE I LOGISTICO	EUROSCORE II
Sustitución aorta ascendente sin sust. Valv. Ao. (Supra-sinusal)
Sustitución aorta ascendente con reparación Val. Ao (Supra-sinusal + reparación)
Sustitución aorta ascendente con sust. Valv. Ao.(Supra-sinusal + prótesis mecánica)
Sustitución aorta ascendente con sust. Valv. Ao.(Supra-sinusal + prótesis biológica)
Reemplazo de raiz aórtica (Bono-Bentall Mecánico)
Reemplazo de raiz aórtica (Bono-Bentall Biológica)
Sustitución arco aórtico AISLADO
Sustitución parcial de arco aórtico y/o asociada a otros segmentos
Sustitución aorta descendente
Remodelado de Raiz Aórtica (Yacoub y variantes)
Reimplantación de raiz aórtica (David y variantes)
Intervención tipo Ross (y variantes)
Aneurisma de aorta torácica descendente abierto con CEC
Aneurisma tóraco-abdominal con CEC
Cirugía de la aorta torácica asociada a revascularización miocáridca
Cirugía de la aorta torácica asociada a otra valvulopatía
TOTAL CIRUGIA DE LA AORTA ELECTIVA	0	0	#DIV/0!	#DIV/0!
SINDROME AÓRTICO AGUDO CON CEC	CASOS	Nº EXITUS	EUROSCORE I LOGISTICO	EUROSCORE II
Disección Tipo A
Disección Tipo B
Ruptura traumática aorta torácica
TOTAL CIRUGIA DEL SÍNDROME AÓRTICO AGUDO	0	0	#DIV/0!	#DIV/0!
TOTAL CIRUGÍA DE LA AORTA CON CEC	0	0	#DIV/0!	#DIV/0!
MISCELANEA	CASOS	Nº EXITUS	EUROSCORE I LOGISTICO	EUROSCORE II
Trasplante cardíaco
Trasplante cardio-pulmonar
Cirugía arritmias con CEC No asociados a otros procedimientos
Tumores cardíacos
Implantación asistencia ventricular con CEC de corta duración
Implantación asistencia ventricular con CEC de larga duración (mas de 30 días)
Otros
TOTAL MISCELANEAS	0	0	#DIV/0!	#DIV/0!
Total Pacientes en los que se ha realizado Cirugía de arritmias asociado o no a otro procedimiento
TOTAL CIRUGIA ADULTOS CON CEC ADQUIRIDA.	0	0
Toracotomías/Esternotomías mini-invasivas utilizadas
Revascularización con Láser asociado o no a derivación
Técnica Port-Access
CIRUGIA CONGENITOS CON CEC
	CASOS	EXITUS	ARISTÓTELES BÁSICO
CIA
Drenaje venoso pulmonar anómalo +/- CIA
Drenaje Venoso pulmonar anómalo TOTAL
CIV (Incluye DSVD sin EP)
DPSAV (ostium primum y transicional)
Defecto completo del Septo AV
T.Fallot o situación Fallot (Incluye AP+CIV y DSVD tipo Fallot)
Atresia pulmonar+CIV+Mapcas
TGA SEPTO INTACTO
TGA compleja ( ASOCIADA A CIV Y/O ARCO Y/O EP)
Truncus arterioso
Estenosis aórtica discreta subvalvular (Membrana; Miomectomía)
Estenosis aórtica supravalvular
Sustitución valvular aórtica
Plastia valvular aórtica
Reemplazo de raiz aórtica (Ross y Ross-Konno)
Reemplazo de raiz aórtica (Bentall- Bentall-Konno)
Técnicas de remodelado y reemplazo de raiz (Yacoub, David y variantes)
Sustitución valvular mitral
Plastia valvular mitral
Sustitución valvular tricuspídea
Plastia valvular tricuspídea aislada
Válvula pulmonar plastia
Válvula pulmonar sustitución
Procedimientos sobre dos válvulas
Procedimientos sobre tres o más válvulas
GLENN
FONTAN y variantes
Conversión de Fontan
Cirugía arco aórtico (interrupción, hipoplasia)
ALCAPA y anomalías coronarias
Fístula sistémico pulmonar con CEC
Norwood y variantes para corazón izdo hipoplásico
Trasplante cardíaco
Trasplante cardiopulmonar
Otros con CEC
TOTAL CIRUGÍA CONGÉNITOS CON CEC	0	0	#DIV/0!
PACIENTES CONGÉNITOS MENORES DE 1 MES CON CEC
PACIENTES CONGÉNITOS MAYORES DE 18 AÑOS CON CEC
CIRUGIA SIN CEC
CORONARIOS	CASOS	Nº EXITUS	EUROSCORE I LOGISTICO	EUROSCORE II
Una derivación
Dos derivaciones
Tres o más derivaciones
TOTAL CORONARIA SIN CEC	0	0	#DIV/0!	#DIV/0!
PACIENTES CON UN INJERTO ARTERIAL
PACIENTES CON MAS DE UN INJERTO ARTERIAL
CONGENITOS	CASOS	Nº EXITUS	ARISTÓTELES BÁSICO
Fistulas sistémico-pulmonares
Banding
Coartación de Ao
Ductus <2,5 kg
Ducuts >2,5 kg
Reparación de anillo vascular
Otros
TOTAL CONGENITOS SIN CEC	0	0	#DIV/0!
PACIENTES CONGÉNITOS MENORES DE 1 MES SIN CEC
PACIENTES CONGÉNITOS MAYORES DE 18 AÑOS SIN CEC
OTRO TIPO DE PROCEDIMIENTOS SIN CEC
MISCELANEA	CASOS	Nº EXITUS	EUROSCORE I LOGISTICO	EUROSCORE II
Implantación de marcapasos
Cambio generador marcapasos
Implantación desfibrilador
Cambio generador desfibrilador
Ventana Pericárdica/Pericardiocentesis
Pericardiectomia
Reoperaciones por sangrado
Reintervenciones por mediastinitis
Reintervenciones por dehiscencia esternal
Asistencia ventricular sin CEC
Rotura de pared libre postinfarto SIN CEC con o sin revascularización.
ECMO
Válvula transcateter via apical
Válvula transcateter via femoral o vascular
Otros
TOTA MISCELÁNEA SIN CEC	0	0	#DIV/0!	#DIV/0!
VASCULAR PERIFERICO
CIRUGÍA ARTERIAL	CASOS	Nº EXITUS
Cirugía de revascularización del sector aorto-ilíaco
Cirugía de revascularización del sector femoropoplíteo y distal
Combinaciones
Cirugía troncos supra-aórticos
Simpatectomía lumbar
TOTAL CIRUGÍA ARTERIAL	0	0
ANEURISMAS	CASOS	Nº EXITUS
Aneurisma aorta toracica abiertos sin CEC
Aneurisma de aorta torácica con endoprótesis
Aneurisma toraco-abdominal abiertos sin CEC
Aneurisma de aorta toracoabdominal o yuxtarrenal con endoprótesis
Aneurisma aorta abdominal abiertos
Aneurisma de aorta abdominal con endoprótesis
Aneurisma arterias periféricas
TOTAL ANEURISMAS	0	0
OTROS	CASOS	Nº EXITUS
Cirugía venosa
Amputaciones
Fistulas AV
Embolectomia
Trauma arterial
Otros
Combinaciones anteriores
TOTAL OTROS, CIRUGIA VASCULAR	0	0
TOTAL CIRUGIA VASCULAR	0	0
RESUMEN ANUAL CIRUGIA CARDIOVASCULAR
ACTIVIDAD ANUAL	CASOS	Nº EXITUS
CIRUGIA ADULTOS ADQUIRIDA CON CEC	0	0
CIRUGIA CONGENITA CON CEC	0	0
CIRUGÍA CORONARIA SIN CEC	0	0
CIRUGÍA CONGENITA SIN CEC	0	0
MISCELANEA SIN CEC	0	0
CIRUGIA VASCULAR	0	0
CIRUGIA TORACICA
TOTAL ACTIVIDAD QUIRURGICA	0	0
TOTAL INTERVENCIONES CON CEC	0	0
TOTAL INTERVENCIONES CARDIACAS MAYORES	0	0
ACTIVIDAD POR CIRUJANO / AÑO
NUMERO INTERVENCIONES MAYORES
CIRUJANO	CASOS
STAFF 1
STAFF 2
STAFF 3
STAFF 4
STAFF 5
STAFF 6
STAFF 7
STAFF 8
STAFF 9
STAFF 10
TOTAL INTERVENCIONES STAFF	0
NÚMERO DE STAFFS EN EL SERVICIO
CIRUJANO	CASOS
RESIDENTE 5º año
RESIDENTE 4º año
RESIDENTE 3er año
RESIDENTE 2º año
RESIDENTE 1er año
OTROS RESIDENTES O BECARIOS
TOTAL INTERVENCIONES RESIDENTES	0
NÚMERO DE RESIDENTES/BECARIOS EN EL SERVICIO
DEMANDAS JUDICIALES
DEMANDAS	NUMERO
CIVILES EN 2016
PENALES EN 2016

## Sheet: Registro de Implantables
OXIGENACION
MARCA	CANTIDAD
SORIN GROUP
MEDTRONIC
JOSTRA
MAQUET
TERUMO
SKIPPER
MEDOS
TOTAL OXIGENACIÓN	0
DISPOSITIVOS BRADICARDIA
MARCA	CANTIDAD MARCAPASOS	CANTIDAD CRT
MEDTRONIC
SORIN GROUP
BOSTON SCIENTIFIC
ELA MEDICAL
ST JUDE MEDICAL
PALEX MEDICAL
CEM BIOTRONIC
VITATRON MEDICAL
TOTAL MARCAPASOS	0	0
DISPOSITIVOS TAQUICARDIA
MARCA	CANTIDAD DAIs	CANTIDAD DAIs+CRTs
ST. JUDE MEDICAL
MEDTRONIC
BOSTON SCIENTIFIC
CEM BIOTRONIC
SORIN GROUP
GUIDANT
TOTAL DESFIBRILADORES	0	0
PRÓTESIS BIOLÓGICAS
TIPO DE PROTESIS	MATERIAL	SOPORTADA/NO SOPORTADA	CANTIDAD
Carpentier-Edwards	Porcina	Stented
Carpentier-Edwards	Pericardio	Stented
Carpentier-Edwards Intuity	Pericardio sutureless	Stented
Carpentier-Edwards	Porcina	Stentless
Medtronic	Porcina	Stented
Medtronic	Porcina	Stentless
Medtronic raíz aórtica	Porcina	Stentless
Medtronic-Venpro Contegra Pulmonary Valved Conduit	Vena Yugular Bovina	Stentless
St. Jude Medical	Porcina	Stented
St. Jude Medical	Porcina	Stentless
St. Jude Medicalraíz aórtica	Porcina	Stentless
St. Jude Medical	Pericardio	Stented
St. Jude Medical	Pericardio	Stentless
Sorin - Livanova	Pericardio	Stented
Sorin - Livanova	Pericardio	Stentless
Sorin - Livanova Perceval	Pericardio bovino sutureless	Stentless
Homoinjerto	Homoinjerto	Stentless
CryoValve	Porcina	Stentless
Shelhigh	Porcina	Stentless
Koehler Aspire	Porcina	Stented
Koehler Elan	Porcina	Stentless
Koehler Root Elan	Porcina	Stentless
Labcor	Porcina	Stented
3F Therapeutics Stentless Equina de Pericardio	Pericardio	Stentless
TOTAL PRÓTESIS BIOLÓGICAS			0
ANILLOS VALVULARES
TIPO	CANTIDAD
Carpentier-Edwards rígido
Carpentier-Edwards semi-rígido
Carpentier-Edwards flexible
Medtronic rígido
Medtronic semi-rígido
Medtronic Flexible
St. Jude Medical rígido
St. Jude Medical semi-rígido
St. Jude Medical flexible
Sorin-CarboMedics Annulo Flo Annuloplasty Ring
TOTAL ANILLOS	0
PRÓTESIS TRANSCATÉTER/SIN SUTURA?
PRÓTESIS	POSICIÓN	CANTIDAD
Edwards Lifesciences Percutaneous	Aortica
Edwards Lifesciences TRANSAPICAL	Aortica
CoreValve Percutaneous Pericardial	Aortica
Medtronic Melody Pulmonary Valve & Right Sided Valve Conduit Replacement	Pulmonar
3F Therapeutics ENABLE	Aortica
3F Therapeutics ENTRATA	Aortica
Edwards Lifesciences Ascendra	Aortica
Sadra Percutaneous Pericardial	Aortica
Nanotechnology Approaches (AorTx & Polmaz-Bailey)	Aortica
Corazon Percutaneous Aortic Valve Repair (PAVR) System	Aortica
Corazon Surgical Aortic Valve Repair (SAVR) System	Aortica
Lotus Boston	Aortica
MitraClip Percutaneous Mitral Valve Repair System	Mitral
Milano Endovascular Edge-to-Edge Repair	Mitral
Viacor Percutaneous Transvenous Mitral Annuloplasty (PTMA)	Mitral
Edwards Viking Endovascular Coronary Sinus Ring	Mitral
Mitralign Retrograde Transventricular Mitral Annuloplasty	Mitral
Carillon Mitral Contour System	Mitral
Myocar Coapsys Transventricular Remodelling	Mitral
3F Therapeutics Percutaneous Bioprostheses for Tricuspid Regurgitation	Tricúspide
TOTAL PRÓTESIS TRANSCATÉTER/SIN SUTURA?		0
PRÓTESIS MECÁNICAS
PRÓTESIS	TIPO DE PRÓTESIS	CANTIDAD
St. Jude Medical Mechanical Prosthesis (HP & Regent)	Bileaflet
CarboMedics Mechanical (Top Hat, Optiform & Orbis)	Bileaflet
Sorin Monoleaflet Allcarbon Mechanical	Monoleaflet
Sorin Bicarbon Mechanical (Slimline & Overline)	Bileaflet
ATS/Medtronic open pivot Mechanical	Bileaflet
On-X Mechanical	Bileaflet
Medtronic-Hall, Medtronic-Hall Easy Fit	Monoleaflet
Medtronic Advantage (Standard & Supra)	Bileaflet
Omnicarbon Mechanical	Monoleaflet
Edwards Mira Mechanical (Finesse & Ultra Finesse)	Bileaflet
Koehler Ultracor Mechanical	Monoleaflet
TOTAL PRÓTESIS MECÁNICAS		0
TUBOS VALVULADOS MECÁNICOS
PRÓTESIS	TIPO DE PRÓTESIS	CANTIDAD
St. Jude Medical Masters Aortic Valved Graft	Bileaflet
CarboMedics Carbo-Seal Aortic Valved Graft	Bileaflet
CarboMedics Carbo-Seal Valsalva Aortic Valved Graft	Bileaflet
ATS Tubo valvulado Mecánico	Bileaflet
ON-X AAP	Bileaflet
Master series hp	Bileaflet
Sorin Carbon Art Aortic Valved Graft	Bileaflet
TOTAL TUBOS VALVULADOS MECÁNICOS		0
TUBOS VALVULADOS BIOLÓGICOS
PRÓTESIS	CANTIDAD
BIOVALSALVA VASCUTEX (senos preformados)
Labcor TLPB-A SUPRA G
Conducto valvulado Carpentier-Edwards
Medtronic conducto valvulado Hancock II
Shellhigh conducto valvulado
TOTAL TUBOS VALVULADOS BIOLÓGICOS	0
BALON DE CONTRAPULSACIÓN
MARCA	CANTIDAD
TELEFLEX
MAQUET
ZENTO MEDICAL
TOTAL BALONES DE CONTRAPULSACIÓN	0
OTROS
MARCA	CANTIDAD
Conducto Dacron / Hemashield sin válvula
Conducto PTFE sin válvula
Parche Pericardio
Parche PTFE 0,4 mm
Membrana PTFE 0,1 mm
TOTAL OTROS	0
OTROS MATERIALES UTILIZADOS NO INCLUIDOS ANTERIORMENTE
TIPO DE MATERIAL	CANTIDAD	OBSERVACIONES
